# Supplementary material
Source: publisher site journal article supplement (https://www.dovepress.com/article/573282)
Supplement: Supplementary file 1 [file 573282_Supplementary%20materials.docx]

**Supplementary Materials**

**Table S1** STROBE Statement

|  | **Item No** | **Recommendation** | **Page number** |
| --- | --- | --- | --- |
| **Title and abstract** | 1 | (*a*) Indicate the study’s design with a commonly used term in the title or the abstract | P1-2 |
| (*b*) Provide in the abstract an informative and balanced summary of what was done and what was found | P1-2 |
| **Introduction** | | |  |
| Background/rationale | 2 | Explain the scientific background and rationale for the investigation being reported | P2-4 |
| Objectives | 3 | State specific objectives, including any prespecified hypotheses | P4 |
| **Methods** | | |  |
| Study design | 4 | Present key elements of study design early in the paper | P4-5 |
| Setting | 5 | Describe the setting, locations, and relevant dates, including periods of recruitment, exposure, follow-up, and data collection | P5-8 |
| Participants | 6 | (*a*) Give the eligibility criteria, and the sources and methods of selection of participants | P5-8 |
| Variables | 7 | Clearly define all outcomes, exposures, predictors, potential confounders, and effect modifiers. Give diagnostic criteria, if applicable | n/a |
| Data sources/ measurement | 8* | For each variable of interest, give sources of data and details of methods of assessment (measurement). Describe comparability of assessment methods if there is more than one group | P5-8 |
| Bias | 9 | Describe any efforts to address potential sources of bias | P7-10 |
| Study size | 10 | Explain how the study size was arrived at | P6-7 |
| Quantitative variables | 11 | Explain how quantitative variables were handled in the analyses. If applicable, describe which groupings were chosen and why | P7-10 |
| Statistical methods | 12 | (*a*) Describe all statistical methods, including those used to control for confounding | P7-10 |
| (*b*) Describe any methods used to examine subgroups and interactions | n/a |
| (*c*) Explain how missing data were addressed | P7-10 |
| (*d*) If applicable, describe analytical methods taking account of sampling strategy | n/a |
| (*e*) Describe any sensitivity analyses | P10 |
| **Results** | | |  |
| Participants | 13* | (a) Report numbers of individuals at each stage of study—eg numbers potentially eligible, examined for eligibility, confirmed eligible, included in the study, completing follow-up, and analysed | P10-12 |
| (b) Give reasons for non-participation at each stage | P10-12 |
| (c) Consider use of a flow diagram | Figure 1 |
| Descriptive data | 14* | (a) Give characteristics of study participants (eg. demographic, clinical, social) and information on exposures and potential confounders | Table 1 |
| (b) Indicate number of participants with missing data for each variable of interest | P10-12 |
| Outcome data | 15* | Report numbers of outcome events or summary measures | P10-14 |
| Main results | 16 | (*a*) Give unadjusted estimates and, if applicable, confounder-adjusted estimates and their precision (eg, 95% confidence interval). Make clear which confounders were adjusted for and why they were included | n/a |
| (*b*) Report category boundaries when continuous variables were categorized | Table 1 |
| (*c*) If relevant, consider translating estimates of relative risk into absolute risk for a meaningful time period | n/a |
| Other analyses | 17 | Report other analyses done—eg analyses of subgroups and interactions, and sensitivity analyses | P10-12 |
| **Discussion** | | |  |
| Key results | 18 | Summarise key results with reference to study objectives | P14 |
| Limitations | 19 | Discuss limitations of the study, taking into account sources of potential bias or imprecision. Discuss both direction and magnitude of any potential bias | P17-18 |
| Interpretation | 20 | Give a cautious overall interpretation of results considering objectives, limitations, multiplicity of analyses, results from similar studies, and other relevant evidence | P19-22 |
| Generalisability | 21 | Discuss the generalisability (external validity) of the study results | P14-17 |
| **Other information** | | |  |
| Funding | 22 | Give the source of funding and the role of the funders for the present study and, if applicable, for the original study on which the present article is based | P19 |

*Give information separately for exposed and unexposed groups.

**Note:** An Explanation and Elaboration article discusses each checklist item and gives methodological background and published examples of transparent reporting. The STROBE checklist is best used in conjunction with this article (freely available on the Web sites of PLoS Medicine at http://www.plosmedicine.org/, Annals of Internal Medicine at http://www.annals.org/, and Epidemiology at http://www.epidem.com/). Information on the STROBE Initiative is available at www.strobe-statement.org.

**Primary validation of the draft scale (1st survey): item selection based on CTT principle**

Discrete trend method: Items 1-B3, 1-C5, 3-B2, 4-A2 exhibited standard deviations < 0.75.

Critical ratio analysis method: Non-significant differences (*p* > 0.05) were found between high/low scoring groups for items 1-A2, 2-B3, 2-C4, 5-A3.

Item-total correlation coefficient method: Items 1-A2, 1-C5, 2-B3, 2-C3, 2-C4, 2-C5, 2-C6, 3-A3, 3-C4, 4-A4, 4-C3 showed item-total correlations < 0.4.

Cronbach’s α coefficient method: While the overall Cronbach’s α was 0.971, items 1-B3, 2-B3, 2-C4, 3-A3, 5-A2 demonstrated corrected item-total correlations < 0.4. Their deletion increased Cronbach’s α, indicating reduced scale homogeneity.

Exploratory factor analysis (EFA): The scale KMO value was 0.873 (> 0.6) and the Bartlett’s sphericity test *χ2* was 9663.358 (*p* < 0.001), indicating that it was suitable for factor analysis. Subsequent analysis revealed that items 1-C4, 1-C10, 2-A1, 3-B2, 4-A4, and 4-C3 exhibited factor loadings < 0.4, indicating inadequate representation of target constructs and poor scale homogeneity. Concurrently, items 1-A1, 2-B3, 2-C1, 3-B1, 3-C4, 4-A2, 4-B1, 4-C4, 5-A2, and 5-A3 demonstrated problematic cross-loadings (> 0.4 on multiple factors with comparable magnitudes), reflecting multidimensionality concerns that compromised measurement specificity.

In summary, based on the principle of item selection, items 1-A2, 1-B3, 1-C5, 2-B3, 2-C4, 3-A3, 3-B2, 3-C4, 4-A2, 4-A4, 4-C3, 5-A2, 5-A3 did not fulfill ≥ 4 methods and were recommended for deletion, resulting in a trial scale containing 61 items (**Table S2**).

**Table S2** The item selection results of the draft scale based on CTT principle

| **Items** | **Discrete Trend Method** | **Critical Ratio Analysis** | **Item-Total Correlation Coefficient** | **Cronbach’s α Coefficient** | **EFA** | **selecting results** |
| --- | --- | --- | --- | --- | --- | --- |
| 1-A1. I understand the need for a low-salt and low-purine diet with high-quality protein and light preparation. | √(s=1.18) | √(*p*＜0.001) | √(*r*=0.523) | √ | × | retain |
| 1-A2. I understand the composition and nutrient content of common foods, including energy, protein, fat, potassium, and sodium. | √(s=1.18) | ×(*p* =0.061) | ×(*r* =0.079) | √ | √ | delete |
| 1-A3. I understand a low-protein diet means 0.8-1.0 g/kg/day protein intake, reducible to 0.6-0.8 g/kg/day with keto acid therapy. | √(s=1.18) | √(*p*＜0.001) | √(*r* =0.530) | √ | √ | retain |
| 1-A4. I understand high-quality protein sources include animal foods (fish, poultry, eggs, dairy, lean meat) and plant proteins (soybeans/products). | √(s=1.24) | √(*p*＜0.001) | √(*r* =0.612) | √ | √ | retain |
| 1-A5. I understand the need to reduce plant protein intake when creatinine levels elevate. | √(s=1.24) | √(*p*＜0.001) | √(*r* =0.593) | √ | √ | retain |
| 1-A6. I understand daily salt intake should be <5g (≈ one beer bottle cap). | √(s=1.30) | √(*p*＜0.001) | √(*r* =0.479) | √ | √ | retain |
| 1-A7. I understand during stable disease periods, daily vegetable intake should be 300-500g and fruit 200-350g (e.g., one medium apple ≈150-200g). | √(s=1.20) | √(*p*＜0.001) | √(*r* =0.678) | √ | √ | retain |
| 1-B1. I believe I can resist temptations from unhealthy foods. | √(s=1.15) | √(*p*＜0.001) | √(*r* =0.590) | √ | √ | retain |
| 1-B2. I believe I can develop appropriate dietary plans under healthcare guidance. | √(s=1.05) | √(*p*＜0.001) | √(*r* =0.580) | √ | √ | retain |
| 1-B3. I’m confident in establishing healthy eating habits. | ×(s=0.72) | √(*p*＜0.001) | √(*r* =0.672) | × | √ | delete |
| 1-C1. I select high-quality protein sources when eating. | √(s=1.11) | √(*p*＜0.001) | √(*r* =0.594) | √ | √ | retain |
| 1-C2. I choose high-calorie and low-protein staples (eg potatoes, lotus root starch, taro, and yam). | √(s=1.25) | √(*p*＜0.001) | √(*r* =0.466) | √ | √ | retain |
| 1-C3. I avoid high-salt foods and seasonings (eg smoked, grilled, pickled items, soy sauce, Monosodium Glutamate). | √(s=1.21) | √(*p*＜0.001) | √(*r* =0.488) | √ | √ | retain |
| 1-C4. During stable disease periods, I consume vegetables and fruits as recommended. | √(s=1.09) | √(*p*＜0.001) | √(*r* =0.768) | √ | × | retain |
| 1-C5. When edema or hyperglycemia occurs, I cautiously select vegetables and fruits or consult nutritionists. | ×(s=0.72) | √(*p*＜0.001) | ×(*r* =0.356) | √ | √ | delete |
| 1-C6. When hyperkalemic, I restrict high-potassium foods (eg mushrooms, spinach, bananas, nuts). | √(s=1.07) | √(*p*＜0.001) | √(*r* =0.646) | √ | √ | retain |
| 1-C7. When hyperphosphatemic, I limit high-phosphorus foods (eg squid, egg yolk, dragon fruit, persimmon). | √(s=1.09) | √(*p*＜0.001) | √(*r* =0.666) | √ | √ | retain |
| 1-C8. During hyperuricemia, I avoid high-purine foods (eg organ meats, seafood, red meat, broths). | √(s=1.10) | √(*p*＜0.001) | √(*r* =0.636) | √ | √ | retain |
| 1-C9. I limit high-fat/cholesterol foods (e.g., fried foods, sweets, fatty meats, and organ meats). | √(s=1.07) | √(*p*＜0.001) | √(*r* =0.607) | √ | √ | retain |
| 1-C10. I use vegetable oils for cooking, limiting intake to ≤ 25ml/day (≈2.5 ceramic spoonfuls). | √(s=1.10) | √(*p*＜0.001) | √(*r* =0.679) | √ | × | retain |
| 1-C11. I maintain regular meals with controlled portions, avoiding extreme hunger/overeating. | √(s=0.89) | √(*p*＜0.001) | √(*r* =0.510) | √ | √ | retain |
| 2-A1. I understand the benefits and risks of each prescribed medication. | √(s=1.08) | √(*p*＜0.001) | √(*r* =0.662) | √ | × | retain |
| 2-A2. I understand nephrotoxic drugs (eg gentamicin, streptomycin) can cause kidney injury. | √(s=1.20) | √(*p*＜0.001) | √(*r* =0.596) | √ | √ | retain |
| 2-A3. I understand some herbal medicines containing aristolochic acid or indeterminate components may damage kidney. | √(s=1.24) | √(*p*＜0.001) | √(*r* =0.563) | √ | √ | retain |
| 2-B1. I believe earlier medication adherence leads to better disease control. | √(s=0.78) | √(*p*＜0.001) | √(*r* =0.505) | √ | √ | retain |
| 2-B2. I recognize the importance of strict adherence to medication schedules. | √(s=0.80) | √(*p*＜0.001) | √(*r* =0.506) | √ | √ | retain |
| 2-B3*. I don’t think skipping occasional doses matters much. | √(s=1.36) | ×(*p* =0.298) | ×(*r* =0.077) | × | × | delete |
| 2-C1. I strictly take prescription medications as prescribed (correct timing, dosage, and method). | √(s=1.09) | √(*p*＜0.001) | √(*r* =0.559) | √ | × | retain |
| 2-C2. I consult professionals before using OTC drugs, supplements, or herbal medicines. | √(s=1.07) | √(*p*＜0.001) | √(*r* =0.656) | √ | √ | retain |
| 2-C3*. I sometimes forget to take my medications. | √(s=1.33) | √(*p* =0.019) | ×(*r* =0.179) | √ | √ | retain |
| 2-C4*. I self-adjust medications when symptoms worsen or new symptoms emerge. | √(s=1.19) | ×(*p* =0.064) | ×(*r* =0.142) | × | √ | delete |
| 2-C5*. I discontinue medications when symptoms improve. | √(s=1.17) | √(*p* =0.027) | ×(*r* =0.177) | √ | √ | retain |
| 2-C6*. I run out of medications without timely refills. | √(s=1.27) | √(*p* =0.028) | ×(*r* =0.182) | √ | √ | retain |
| 3-A1. I understand suitable exercise types for my condition (eg brisk walking, Tai Chi, cycling, table tennis, badminton, jogging, swimming). | √(s=1.21) | √(*p*＜0.001) | √(*r* =0.417) | √ | √ | retain |
| 3-A2. I know the recommended regimen: 3-5 sessions/week, 30-60 min/session, with ≥150 min weekly moderate-intensity exercise. | √(s=1.22) | √(*p*＜0.001) | √(*r* =0.418) | √ | √ | retain |
| 3-A3. I know exercise termination criteria: fatigue, tachycardia, hematuria, proteinuria, or edema. | √(s=1.25) | √(*p*＜0.001) | ×(*r* =0.380) | × | √ | delete |
| 3-A4. I understand vigorous exercise may worsen disease control. | √(s=0.96) | √(*p*＜0.001) | √(*r* =0.510) | √ | √ | retain |
| 3-B1. I believe regular exercise is essential. | √(s=0.80) | √(*p*＜0.001) | √(*r* =0.590) | √ | × | retain |
| 3-B2. I’m confident in my ability to engage in exercise regimens under the guidance of healthcare professionals. | ×(s=0.72) | √(*p*＜0.001) | √(*r* =0.634) | √ | × | delete |
| 3-C1. I actively perform prescribed exercises weekly. | √(s=1.14) | √(*p*＜0.001) | √(*r* =0.652) | √ | √ | retain |
| 3-C2. During exercise, I monitor my physical responses to prevent overexertion. | √(s=1.01) | √(*p*＜0.001) | √(*r* =0.694) | √ | √ | retain |
| 3-C3. I regularly assess exercise efficacy (eg cardiopulmonary function, muscle strength). | √(s=1.22) | √(*p*＜0.001) | √(*r* =0.646) | √ | √ | retain |
| 3-C4. I optimize exercise plans based on assessment results. | √(s=1.23) | √(*p*＜0.001) | ×(*r* =0.398) | √ | × | delete |
| 4-A1. I understand smoking, alcohol, obesity, and constipation can harm kidney function. | √(s=0.88) | √(*p*＜0.001) | √(*r* =0.648) | √ | √ | retain |
| 4-A2. I recognize positive mindset benefits for disease management. | ×(s=0.70) | √(*p*＜0.001) | √(*r* =0.612) | √ | × | delete |
| 4-A3. I know daily fluid intake should be 1.5-1.7L without edema/normal urine output. | √(s=1.10) | √(*p*＜0.001) | √(*r* =0.606) | √ | √ | retain |
| 4-A4. I understand fluid adjustments are needed with edema/reduced urine output. | √(s=1.10) | √(*p*＜0.001) | ×(*r* =0.308) | √ | × | delete |
| 4-B1. I believe I can maintain healthy habits like regular routines and tobacco/alcohol abstinence. | √(s=0.96) | √(*p*＜0.001) | √(*r* =0.630) | √ | × | retain |
| 4-B2. I believe I can maintain optimism. | √(s=1.01) | √(*p*＜0.001) | √(*r* =0.546) | √ | √ | retain |
| 4-C1. I do not smoke or am actively reducing smoking. | √(s=1.21) | √(*p*＜0.001) | √(*r* =0.521) | √ | √ | retain |
| 4-C2. I abstain from alcohol or am quitting drinking. | √(s=1.09) | √(*p*＜0.001) | √(*r* =0.500) | √ | √ | retain |
| 4-C3. I regularly monitor and control body weight. | √(s=1.13) | √(*p*＜0.001) | ×(*r* =0.256) | √ | × | delete |
| 4-C4. I consume fluids appropriately as advised. | √(s=0.99) | √(*p*＜0.001) | √(*r* =0.686) | √ | × | retain |
| 4-C5. I use multiple methods to prevent constipation. | √(s=1.07) | √(*p*＜0.001) | √(*r* =0.694) | √ | √ | retain |
| 4-C6. I take precautions against infections (eg respiratory/urinary tract). | √(s=1.01) | √(*p*＜0.001) | √(*r* =0.694) | √ | √ | retain |
| 4-C7. I ensure 6-8+ hours of regular sleep nightly. | √(s=1.07) | √(*p*＜0.001) | √(*r* =0.679) | √ | √ | retain |
| 4-C8. I employ strategies to manage stress and emotions. | √(s=1.05) | √(*p*＜0.001) | √(*r* =0.646) | √ | √ | retain |
| 4-C9. I maintain social engagement for emotional support. | √(s=1.13) | √(*p*＜0.001) | √(*r* =0.703) | √ | √ | retain |
| 5-A1. I understand what specific activities are required for self-monitoring and regular medical follow-ups. | √(s=1.19) | √(*p*＜0.001) | √(*r* =0.690) | √ | √ | retain |
| 5-A2. I understand disease etiology, symptoms, and potential complications. | √(s=1.24) | √(*p*＜0.001) | √(*r* =0.691) | × | × | delete |
| 5-A3. Chronic kidney disease consists of stages 1 to 5, and I know which stage I am in now. | √(s=1.38) | ×(*p* =0.051) | √(*r* =0.642) | √ | × | delete |
| 5-A4. I recognize self-monitoring and regular follow-ups prevent cardiovascular complications. | √(s=1.10) | √(*p*＜0.001) | √(*r* =0.692) | √ | √ | retain |
| 5-A5. I understand edema can be assessed by checking for swelling in the eyelids, ankles, or fingers. | √(s=1.14) | √(*p*＜0.001) | √(*r* =0.619) | √ | √ | retain |
| 5-A6. I understand urine conditions can be evaluated by observing urine volume, color, and presence of froth. | √(s=1.19) | √(*p*＜0.001) | √(*r* =0.644) | √ | √ | retain |
| 5-A7. I understand symptoms like fatigue, weakness, and unusual paleness of lips/nail beds may indicate anemia. | √(s=1.13) | √(*p*＜0.001) | √(*r* =0.616) | √ | √ | retain |
| 5-B1. I believe self-monitoring and medical follow-ups enable early detection of health changes. | √(s=0.92) | √(*p*＜0.001) | √(*r* =0.679) | √ | √ | retain |
| 5-C1. I strictly adhere to physician’ schedules for check-ups and follow-ups. | √(s=1.03) | √(*p*＜0.001) | √(*r* =0.658) | √ | √ | retain |
| 5-C2. I measure and record my blood pressure daily at fixed times. | √(s=1.31) | √(*p*＜0.001) | √(*r* =0.654) | √ | √ | retain |
| 5-C3. I routinely monitor for signs of edema. | √(s=1.34) | √(*p*＜0.001) | √(*r* =0.683) | √ | √ | retain |
| 5-C4. I track and document daily urine output and characteristics. | √(s=1.33) | √(*p*＜0.001) | √(*r* =0.655) | √ | √ | retain |
| 5-C5. I monitor blood glucose regularly and complication. | √(s=1.26) | √(*p*＜0.001) | √(*r* =0.618) | √ | √ | retain |
| 5-C6. I monitor for anemia signs. | √(s=1.27) | √(*p*＜0.001) | √(*r* =0.616) | √ | √ | retain |
| 5-C7. I watch for symptoms such as nausea or loss of appetite. | √(s=1.26) | √(*p*＜0.001) | √(*r* =0.663) | √ | √ | retain |
| 5-C8. I promptly report disease-related symptom changes to physicians. | √(s=0.95) | √(*p*＜0.001) | √(*r* =0.560) | √ | √ | retain |

**Notes:*** Indicates reverse-scored items; “√” indicates compliance with the standard, and “×” indicates non-compliance with the standard.

**Validation of the trial scale (2nd survey): item selection based on CTT and IRT principles**

**The item selection results of the trial scale based on CTT principle**

Discrete trend method: Items 1-A4, 1-C4, 1-C8, 3-A3, 3-C3, 4-A2, 5-C8 exhibited standard deviations <0.75.

Critical ratio analysis method: Non-significant differences (*p* > 0.05) were found between high/low scoring groups for items 1-A4, 2-A1, 4-C8, 5-C6.

Item-total correlation coefficient method: Items 1-A4, 2-A1, 3-C3, 5-A2, 5-C6, 5-C8 showed item-total correlations < 0.4.

Cronbach’s α coefficient method: While the overall Cronbach’s α was 0.962, items 1-A4, 3-C3 demonstrated corrected item-total correlations < 0.4. Their deletion increased Cronbach’s α, indicating reduced scale homogeneity.

EFA: The scale KMO value was 0.913 (> 0.6) and the Bartlett’s sphericity test χ2 was 20140.988 (*p* < 0.001), indicating that it was suitable for factor analysis. Subsequent analysis revealed that items 1-A5, 1-C1, 1-C3, 3-A3 and 4-A1exhibited factor loadings < 0.4, indicating inadequate representation of target constructs and poor scale homogeneity. Concurrently, items 1-A3, 1-C4, 1-C8, 3-A2, 3-A3, 4-C2, 4-C6, 4-C7, 4-C8, 5-A2, 5-A3 and 5-A4 demonstrated problematic cross-loadings (> 0.4 on multiple factors with comparable magnitudes), reflecting multidimensionality concerns that compromised measurement specificity.

In summary, based on the principle of item selection, items 1-A4, 1-C4, 1-C8, 2-A1, 3-A3, 3-C3, 4-A2, 4-C8, 5-A2, 5-C6, 5-C8 did not fulfill ≥ 4 methods and were recommended for deletion (**Table S3**).

**Table S3** The item selection results of the trial scale based on CTT principle

| **Items** | **Discrete Trend Method** | **Critical Ratio Analysis** | **Item-Total Correlation Coefficient** | **Cronbach’s α Coefficient** | **EFA** | **selecting results** |
| --- | --- | --- | --- | --- | --- | --- |
| 1-A1. I understand the need for a low-salt and low-purine diet with high-quality protein and light preparation. | √(s =0.99) | √(*p*＜0.001) | √(*r* =0.464) | √ | √ | retain |
| 1-A2. I understand a low-protein diet means 0.8-1.0 g/kg/day protein intake, reducible to 0.6-0.8 g/kg/day with keto acid therapy. | √(s =1.14) | √(*p*＜0.001) | √(*r* =0.544) | √ | √ | retain |
| 1-A3. I understand high-quality protein sources include animal foods (fish, poultry, eggs, dairy, lean meat) and plant proteins (soybeans/products). | √(s =1.07) | √(*p*＜0.001) | √(*r* =0.616) | √ | × | retain |
| 1-A4. I understand the need to reduce plant protein intake when creatinine levels elevate. | ×(s =0.73) | ×(*p* = 0.574) | ×(*r* = -0.007) | × | √ | delete |
| 1-A5. I understand during stable disease periods, daily vegetable intake should be 300-500g and fruit 200-350g (eg one medium apple ≈150-200g). | √(s =1.07) | √(*p*＜0.001) | √(*r* =0.551) | √ | × | retain |
| 1-B1. I believe I can resist temptations from unhealthy foods. | √(s =1.02) | √(*p*＜0.001) | √(*r* =0.631) | √ | √ | retain |
| 1-C1. I select high-quality protein sources when eating. | √(s =1.05) | √(*p*＜0.001) | √(*r* =0.547) | √ | × | retain |
| 1-C2. I choose high-calorie and low-protein staples (eg potatoes, lotus root starch, taro, and yam). | √(s =1.11) | √(*p*＜0.001) | √(*r* =0.406) | √ | √ | retain |
| 1-C3. I avoid high-salt foods and seasonings (eg smoked, grilled, pickled items, soy sauce, Monosodium Glutamate). | √(s =1.10) | √(*p*＜0.001) | √(*r* =0.526) | √ | × | retain |
| 1-C4. During stable disease periods, I consume vegetables and fruits as recommended. | ×(s =0.60) | √(*p*＜0.001) | √(*r* =0.427) | √ | × | delete |
| 1-C5. When hyperkalemic, I restrict high-potassium foods (eg mushrooms, spinach, bananas, nuts). | √(s =1.07) | √(*p*＜0.001) | √(*r* =0.649) | √ | √ | retain |
| 1-C6. When hyperphosphatemic, I limit high-phosphorus foods (eg squid, egg yolk, dragon fruit, persimmon). | √(s =1.09) | √(*p*＜0.001) | √(*r* =0.627) | √ | √ | retain |
| 1-C7. During hyperuricemia, I avoid high-purine foods (eg organ meats, seafood, red meat, broths). | √(s =1.01) | √(*p*＜0.001) | √(*r* =0.640) | √ | √ | retain |
| 1-C8. I limit high-fat/cholesterol foods (eg fried foods, sweets, fatty meats, and organ meats). | ×(s =0.74) | √(*p*＜0.001) | √(*r* =0.531) | √ | × | delete |
| 1-C9. I use vegetable oils for cooking, limiting intake to ≤25 ml/day (≈2.5 ceramic spoonfuls). | √(s =1.08) | √(*p*＜0.001) | √(*r* =0.665) | √ | √ | retain |
| 2-A1. I understand the benefits and risks of each prescribed medication. | √(s =1.07) | ×(*p* =0.059) | ×(*r* =0.326) | √ | √ | delete |
| 2-A2. I understand nephrotoxic drugs (eg gentamicin, streptomycin) can cause kidney injury. | √(s =1.24) | √(*p*＜0.001) | √(*r* =0.515) | √ | √ | retain |
| 2-A3. I understand some herbal medicines containing aristolochic acid or indeterminate components may damage kidney. | √(s =1.22) | √(*p*＜0.001) | √(*r* =0.523) | √ | √ | retain |
| 2-B1. I believe earlier medication adherence leads to better disease control. | √(s =0.94) | √(*p*＜0.001) | √(*r* =0.501) | √ | √ | retain |
| 2-C1. I strictly take prescription medications as prescribed (correct timing, dosage, and method). | √(s =0.98) | √(*p*＜0.001) | √(*r* =0.476) | √ | √ | retain |
| 2-C2. I consult professionals before using OTC drugs, supplements, or herbal medicines. | √(s =1.06) | √(*p*＜0.001) | √(*r* =0.515) | √ | √ | retain |
| 2-C3*. I sometimes forget to take my medications. | √(s =1.28) | √(*p*＜0.001) | √(*r* =0.515) | √ | √ | retain |
| 2-C4*. I discontinue medications when symptoms improve. | √(s =1.17) | √(*p*＜0.001) | √(*r* =0.482) | √ | √ | retain |
| 2-C5*. I run out of medications without timely refills. | √(s =1.26) | √(*p*＜0.001) | √(*r* =0.522) | √ | √ | retain |
| 3-A1. I understand suitable exercise types for my condition (eg brisk walking, Tai Chi, cycling, table tennis, badminton, jogging, swimming). | √(s =1.10) | √(*p*＜0.001) | √(*r* =0.525) | √ | √ | retain |
| 3-A2. I know the recommended regimen: 3-5 sessions/week, 30-60 min/session, with ≥150 min weekly moderate-intensity exercise. | √(s =1.14) | √(*p*＜0.001) | √(*r* =0.601) | √ | × | retain |
| 3-A3. I understand vigorous exercise may worsen disease control. | ×(s =0.72) | √(*p*＜0.001) | √(*r* =0.436) | √ | × | delete |
| 3-B1. I believe regular exercise is essential. | √(s =0.88) | √(*p*＜0.001) | √(*r* =0.600) | √ | √ | retain |
| 3-C1. I actively perform prescribed exercises weekly. | √(s =1.11) | √(*p*＜0.001) | √(*r* =0.581) | √ | √ | retain |
| 3-C2. During exercise, I monitor my physical responses to prevent overexertion. | √(s =1.00) | √(*p*＜0.001) | √(*r* =0.614) | √ | √ | retain |
| 3-C3. I regularly assess exercise efficacy (eg cardiopulmonary function, muscle strength). | ×(s =0.74) | √(*p*＜0.001) | ×(*r* =0.256) | √ | √ | delete |
| 4-A1. I understand smoking, alcohol, obesity, and constipation can harm kidney function. | √(s =0.98) | √(*p*＜0.001) | √(*r* =0.618) | √ | × | retain |
| 4-A2. I know daily fluid intake should be 1.5-1.7L without edema/normal urine output. | ×(s =0.74) | √(*p*＜0.001) | √(*r* =0.508) | √ | × | delete |
| 4-B1. I believe I can maintain healthy habits like regular routines and tobacco/alcohol abstinence. | √(s =0.89) | √(*p*＜0.001) | √(*r* =0.596) | √ | √ | retain |
| 4-C1. I do not smoke or am actively reducing smoking. | √(s =1.13) | √(*p*＜0.001) | √(*r* =0.480) | √ | √ | retain |
| 4-C2. I abstain from alcohol or am quitting drinking. | √(s =1.02) | √(*p*＜0.001) | √(*r* =0.567) | √ | × | retain |
| 4-C3. I consume fluids appropriately as advised. | √(s =0.94) | √(*p*＜0.001) | √(*r* =0.710) | √ | √ | retain |
| 4-C4. I use multiple methods to prevent constipation. | √(s =0.98) | √(*p*＜0.001) | √(*r* =0.613) | √ | √ | retain |
| 4-C5. I take precautions against infections (eg respiratory/urinary tract). | √(s =0.90) | √(*p*＜0.001) | √(*r* =0.647) | √ | √ | retain |
| 4-C6. I ensure 6-8+ hours of regular sleep nightly. | √(s =1.00) | √(*p*＜0.001) | √(*r* =0.572) | √ | × | retain |
| 4-C7. I employ strategies to manage stress and emotions. | √(s =0.98) | √(*p*＜0.001) | √(*r* =0.633) | √ | × | retain |
| 4-C8. I maintain social engagement for emotional support. | √(s =1.08) | ×(*p* = 0.519) | √(*r* =0.641) | √ | × | delete |
| 5-A1. I understand what specific activities are required for self-monitoring and regular medical follow-ups. | √(s =1.07) | √(*p*＜0.001) | √(*r* =0.728) | √ | √ | retain |
| 5-A2. I recognize self-monitoring and regular follow-ups prevent cardiovascular complications. | √(s =1.01) | √(*p*＜0.001) | ×(*r* =0.372) | √ | × | delete |
| 5-A3. I understand edema can be assessed by checking for swelling in the eyelids, ankles, or fingers. | √(s =1.04) | √(*p*＜0.001) | √(*r* =0.693) | √ | × | retain |
| 5-A4. I understand urine conditions can be evaluated by observing urine volume, color, and presence of froth. | √(s =1.00) | √(*p*＜0.001) | √(*r* =0.688) | √ | × | retain |
| 5-A5. I understand symptoms like fatigue, weakness, and unusual paleness of lips/nail beds may indicate anemia. | √(s =1.03) | √(*p*＜0.001) | √(*r* =0.621) | √ | √ | retain |
| 5-B1. I believe self-monitoring and medical follow-ups enable early detection of health changes | √(s =0.85) | √(*p*＜0.001) | √(*r* =0.600) | √ | √ | retain |
| 5-C1. I strictly adhere to physician’ schedules for check-ups and follow-ups. | √(s =0.91) | √(*p*＜0.001) | √(*r* =0.627) | √ | √ | retain |
| 5-C2. I measure and record my blood pressure daily at fixed times. | √(s =1.20) | √(*p*＜0.001) | √(*r* =0.592) | √ | √ | retain |
| 5-C3. I routinely monitor for signs of edema. | √(s =1.13) | √(*p*＜0.001) | √(*r* =0.686) | √ | √ | retain |
| 5-C4. I track and document daily urine output and characteristics. | √(s =1.17) | √(*p*＜0.001) | √(*r* =0.604) | √ | √ | retain |
| 5-C5. I monitor blood glucose regularly and complication. | √(s =1.26) | √(*p*＜0.001) | √(*r* =0.629) | √ | √ | retain |
| 5-C6. I monitor for anemia signs. | √(s =1.17) | ×(*p* = 0.663) | ×(*r* =0.366) | √ | √ | delete |
| 5-C7. I watch for symptoms such as nausea or loss of appetite. | √(s =1.09) | √(*p*＜0.001) | √(*r* =0.670) | √ | √ | retain |
| 5-C8. I promptly report disease-related symptom changes to physicians. | ×(s =0.70) | √(*p*＜0.001) | ×(*r* =0.325) | √ | √ | delete |

**Notes:** * Indicates reverse-scored items; “√” indicates compliance with the standard, and “×” indicates non-compliance with the standard.

**The item selection results of the trial scale based on IRT principle**

Discrimination parameters (*a*): The parameters *a* value for all 56 items ranged from -0.043 to 2.273. Parameter *a* for Item 1-A4 was -0.043, which can be considered for deletion.

Difficulty parameters (*b*): Item 1-A4 has difficulty parameters *b* values between -37.350 and 130.935, the *b1* values of Items 1-C4, 2-A2, 2-B1, 2-C1, 2-C3, 2-C4, 3-A3, and 3-C3 were -6.102, -5.427, -5.617, -5.115, -5.435, -5.049, -5.977, and -8.963. Items 4-A2 and 5-C8 had only 2 and 3 difficulty parameters, respectively, and the above items can be considered for deletion (**Table S4**).

**Table S4** The discrimination parameters and difficulty parameters of each item of the trial scale

| **Items** | **Discrimination parameters (*a*)** | **Difficulty parameters (b)** | | | |
| --- | --- | --- | --- | --- | --- |
| ***b1*** | ***b2*** | ***b3*** | ***b4*** |
| 1-A1 | 0.901 | -4.591 | -2.288 | -1.519 | 1.460 |
| 1-A2 | 1.066 | -2.096 | -0.910 | 0.918 | 2.578 |
| 1-A3 | 1.402 | -2.816 | -1.670 | -0.501 | 1.158 |
| 1-A4 | -0.043 | 130.935 | 120.661 | 11.722 | -37.350 |
| 1-A5 | 1.132 | -2.791 | -1.509 | 0.053 | 2.087 |
| 1-B1 | 1.514 | -2.587 | -1.423 | -0.140 | 1.438 |
| 1-C1 | 1.264 | -3.144 | -1.529 | -0.500 | 1.561 |
| 1-C2 | 0.787 | -3.473 | -1.249 | 0.540 | 2.993 |
| 1-C3 | 1.255 | -3.155 | -1.666 | -0.843 | 1.067 |
| 1-C4 | 0.909 | -6.102 | -4.846 | -1.003 | 3.584 |
| 1-C5 | 1.680 | -2.556 | -1.518 | -0.263 | 1.062 |
| 1-C6 | 1.517 | -2.541 | -1.451 | -0.187 | 1.253 |
| 1-C7 | 1.626 | -2.945 | -1.692 | -0.642 | 0.938 |
| 1-C8 | 1.351 | -4.890 | -3.284 | -1.405 | 0.922 |
| 1-C9 | 1.626 | -2.532 | -1.388 | -0.248 | 1.221 |
| 2-A1 | 1.428 | -2.672 | -1.571 | -0.061 | 1.389 |
| 2-A2 | 0.967 | -5.427 | -2.204 | -0.274 | 1.928 |
| 2-A3 | 1.038 | -4.272 | -2.315 | -0.435 | 1.421 |
| 2-B1 | 0.925 | -5.617 | -2.343 | -0.287 | 2.023 |
| 2-C1 | 0.911 | -5.115 | -3.040 | -0.666 | 1.477 |
| 2-C2 | 1.016 | -4.343 | -2.353 | -0.445 | 1.445 |
| 2-C3* | 0.965 | -5.435 | -2.207 | -0.273 | 1.956 |
| 2-C4* | 0.925 | -5.049 | -3.047 | -0.719 | 1.380 |
| 2-C5* | 1.036 | -4.276 | -2.350 | -0.453 | 1.404 |
| 3-A1 | 1.115 | -3.692 | -1.710 | 0.289 | 1.980 |
| 3-A2 | 1.321 | -2.725 | -1.208 | 0.335 | 1.711 |
| 3-A3 | 1.062 | -5.977 | -1.537 | 0.895 | - |
| 3-B1 | 1.490 | -2.964 | -1.358 | -0.166 | 1.455 |
| 3-C1 | 1.510 | -2.612 | -1.265 | -0.170 | 1.299 |
| 3-C2 | 1.694 | -2.629 | -1.765 | -0.786 | 0.932 |
| 3-C3 | 0.402 | -8.963 | -0.405 | 6.128 | 9.504 |
| 4-A1 | 1.818 | -2.660 | -1.910 | -1.059 | 0.663 |
| 4-A2 | 1.273 | -0.370 | 1.444 | - | - |
| 4-B1 | 1.673 | -3.251 | -2.203 | -1.079 | 0.730 |
| 4-C1 | 1.208 | -2.897 | -2.042 | -1.228 | 0.410 |
| 4-C2 | 1.541 | -2.738 | -1.991 | -1.517 | 0.275 |
| 4-C3 | 2.273 | -2.687 | -1.970 | -0.714 | 0.623 |
| 4-C4 | 1.769 | -2.634 | -1.938 | -0.467 | 1.039 |
| 4-C5 | 2.000 | -2.786 | -2.185 | -0.622 | 0.838 |
| 4-C6 | 1.519 | -3.039 | -1.717 | -0.764 | 1.054 |
| 4-C7 | 1.873 | -3.216 | -1.313 | -0.356 | 1.208 |
| 4-C8 | 1.743 | -2.768 | -1.144 | -0.258 | 1.186 |
| 5-A1 | 2.267 | -2.475 | -1.267 | -0.376 | 0.824 |
| 5-A2 | 1.913 | -2.973 | -1.488 | -0.432 | 0.896 |
| 5-A3 | 1.955 | -2.518 | -1.515 | -0.220 | 1.083 |
| 5-A4 | 2.083 | -2.378 | -1.538 | -0.541 | 0.996 |
| 5-A5 | 1.685 | -2.711 | -1.412 | 0.122 | 1.310 |
| 5-B1 | 1.401 | -2.167 | -0.602 | 0.951 | 1.899 |
| 5-C1 | 1.494 | -2.139 | -0.607 | 0.681 | 1.717 |
| 5-C2 | 1.409 | -2.101 | -1.091 | 0.166 | 1.389 |
| 5-C3 | 1.995 | -2.218 | -1.319 | -0.435 | 0.786 |
| 5-C4 | 1.397 | -1.834 | -0.731 | 0.776 | 1.839 |
| 5-C5 | 1.502 | -1.743 | -0.610 | 0.578 | 1.433 |
| 5-C6 | 1.841 | -1.804 | -0.800 | 0.355 | 1.476 |
| 5-C7 | 1.820 | -2.344 | -1.326 | -0.251 | 1.202 |
| 5-C8 | 1.196 | -4.808 | -1.636 | 0.791 | - |

Item characteristic curve (ICC): ICCs for items 1-A4, 3-A3, 3-C3, and 5-C8 are significantly covered or flattened and may be considered for deletion (**Figure S1**).


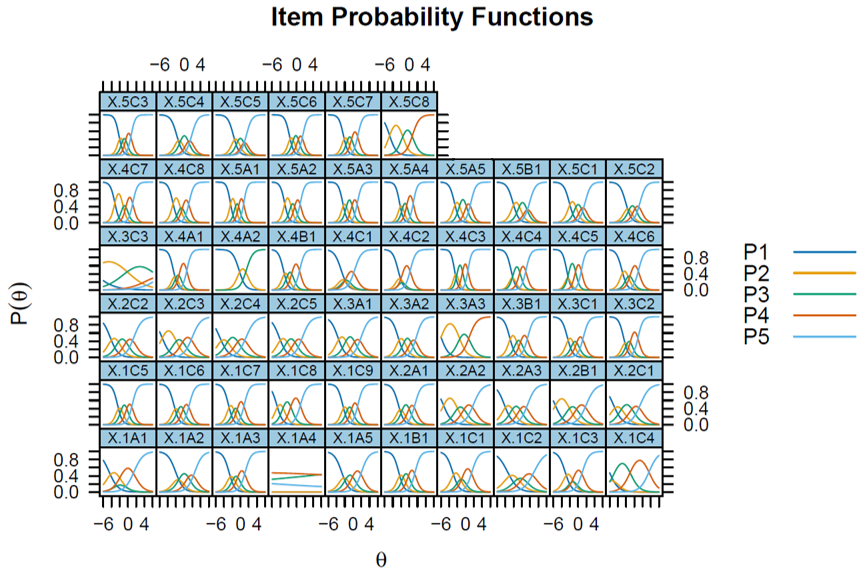


**Figure S1** The ICCs of 56 items in the trial scale.

**Notes:** The five curves in the figure respectively correspond to the reaction probabilities of the subjects on the five options.

Based on the item selection results from CTT and IRT, items 1-A4, 1-C4, 1-C8, 2-A1, 3-A3, 3-C3, 4-A2, 4-C8, 5-A2, 5-C6, and 5-C8 were deleted. Despite deviations in difficulty parameters (*b*) for items 2-A2, 2-B1, 2-C1, 2-C3, and 2-C4 beyond the ideal range, these items were retained following the research group due to their essential representation of core construct dimensions, and all the other indexes met the established standards. Therefore, a total of 11 items were excluded, resulting in a final scale containing 5 dimensions and 45 items.

**Evaluation of the final scale (3rd survey)**

**Content validity**

**Table S5** Content validity index of each item of the final scale

| **Items** | **Expert 1** | **Expert 2** | **Expert 3** | **Expert 4** | **Expert 5** | **Expert 6** | **Expert 7** | **Expert 8** | **The number of experts with a score of 3 or 4** | **I-CVI** |
| --- | --- | --- | --- | --- | --- | --- | --- | --- | --- | --- |
| 1-A1 | 4 | 4 | 4 | 4 | 4 | 4 | 4 | 4 | 8 | 1 |
| 1-A2 | 4 | 4 | 4 | 4 | 4 | 3 | 3 | 4 | 8 | 1 |
| 1-A3 | 4 | 4 | 4 | 4 | 4 | 3 | 4 | 4 | 8 | 1 |
| 1-A4 | 4 | 4 | 4 | 4 | 4 | 3 | 3 | 4 | 8 | 1 |
| 1-B1 | 3 | 4 | 3 | 4 | 4 | 2 | 3 | 4 | 7 | 0.875 |
| 1-C1 | 4 | 4 | 4 | 4 | 4 | 4 | 4 | 4 | 8 | 1 |
| 1-C2 | 4 | 4 | 4 | 4 | 4 | 4 | 4 | 4 | 8 | 1 |
| 1-C3 | 4 | 4 | 4 | 4 | 4 | 4 | 4 | 4 | 8 | 1 |
| 1-C4 | 4 | 4 | 4 | 4 | 4 | 4 | 4 | 4 | 8 | 1 |
| 1-C5 | 4 | 4 | 4 | 4 | 4 | 4 | 4 | 4 | 8 | 1 |
| 1-C6 | 4 | 4 | 4 | 4 | 4 | 4 | 4 | 4 | 8 | 1 |
| 1-C7 | 4 | 4 | 4 | 4 | 4 | 4 | 4 | 4 | 8 | 1 |
| 2-A1 | 4 | 4 | 4 | 4 | 4 | 4 | 4 | 4 | 8 | 1 |
| 2-A2 | 4 | 4 | 4 | 4 | 4 | 4 | 4 | 4 | 8 | 1 |
| 2-B1 | 4 | 4 | 4 | 4 | 4 | 4 | 4 | 4 | 8 | 1 |
| 2-C1 | 4 | 4 | 4 | 4 | 4 | 4 | 4 | 4 | 8 | 1 |
| 2-C2 | 4 | 4 | 4 | 4 | 4 | 4 | 4 | 4 | 8 | 1 |
| 2-C3 | 4 | 4 | 4 | 4 | 4 | 4 | 4 | 4 | 8 | 1 |
| 2-C4 | 4 | 4 | 4 | 4 | 4 | 4 | 4 | 4 | 8 | 1 |
| 2-C5 | 4 | 4 | 4 | 4 | 4 | 4 | 4 | 4 | 8 | 1 |
| 3-A1 | 4 | 4 | 4 | 4 | 4 | 3 | 4 | 4 | 8 | 1 |
| 3-A2 | 4 | 4 | 4 | 4 | 4 | 3 | 4 | 4 | 8 | 1 |
| 3-B1 | 4 | 4 | 4 | 4 | 4 | 2 | 4 | 4 | 7 | 0.875 |
| 3-C1 | 4 | 4 | 4 | 4 | 4 | 4 | 4 | 4 | 8 | 1 |
| 3-C2 | 4 | 4 | 4 | 4 | 4 | 4 | 3 | 4 | 8 | 1 |
| 4-A1 | 4 | 4 | 4 | 4 | 4 | 4 | 4 | 4 | 8 | 1 |
| 4-B1 | 3 | 4 | 4 | 4 | 4 | 2 | 4 | 4 | 7 | 0.875 |
| 4-C1 | 4 | 4 | 4 | 4 | 4 | 4 | 4 | 4 | 8 | 1 |
| 4-C2 | 4 | 4 | 4 | 4 | 4 | 4 | 4 | 4 | 8 | 1 |
| 4-C3 | 4 | 4 | 4 | 4 | 4 | 4 | 3 | 4 | 8 | 1 |
| 4-C4 | 4 | 4 | 4 | 4 | 4 | 4 | 3 | 4 | 8 | 1 |
| 4-C5 | 4 | 4 | 4 | 4 | 4 | 4 | 4 | 4 | 8 | 1 |
| 4-C6 | 4 | 4 | 4 | 4 | 4 | 4 | 4 | 4 | 8 | 1 |
| 4-C7 | 4 | 4 | 4 | 4 | 4 | 4 | 3 | 4 | 8 | 1 |
| 5-A1 | 4 | 4 | 4 | 4 | 4 | 4 | 4 | 4 | 8 | 1 |
| 5-A2 | 4 | 4 | 4 | 4 | 4 | 3 | 4 | 4 | 8 | 1 |
| 5-A3 | 4 | 4 | 4 | 4 | 4 | 3 | 4 | 4 | 8 | 1 |
| 5-A4 | 4 | 4 | 3 | 4 | 4 | 3 | 3 | 4 | 8 | 1 |
| 5-B1 | 4 | 4 | 4 | 4 | 4 | 3 | 4 | 4 | 8 | 1 |
| 5-C1 | 4 | 4 | 4 | 4 | 4 | 4 | 4 | 4 | 8 | 1 |
| 5-C2 | 4 | 4 | 4 | 4 | 4 | 4 | 4 | 4 | 8 | 1 |
| 5-C3 | 4 | 4 | 4 | 4 | 4 | 4 | 4 | 4 | 8 | 1 |
| 5-C4 | 4 | 4 | 4 | 4 | 4 | 4 | 4 | 4 | 8 | 1 |
| 5-C5 | 4 | 4 | 4 | 4 | 4 | 4 | 4 | 4 | 8 | 1 |
| 5-C6 | 4 | 4 | 4 | 4 | 4 | 4 | 4 | 4 | 8 | 1 |

**Discrimination and difficulty**

**Table S6** The discrimination parameters and difficulty parameters of each item of the final scale

| **Items** | **Discrimination parameters (*a*)** | **Difficulty parameters (*b*)** | | | |
| --- | --- | --- | --- | --- | --- |
| ***b1*** | ***b2*** | ***b3*** | ***b4*** |
| A1 | 1.816 | -2.804 | -1.921 | -0.565 | 1.013 |
| A2 | 1.741 | -3.064 | -1.829 | -0.326 | 1.247 |
| A3 | 1.902 | -2.836 | -2.035 | -0.614 | 1.006 |
| A4 | 1.842 | -3.122 | -1.953 | -0.481 | 0.980 |
| A5 | 1.887 | -2.970 | -1.962 | -0.505 | 1.031 |
| A6 | 1.629 | -2.910 | -1.839 | -0.538 | 1.135 |
| A7 | 1.727 | -2.901 | -1.894 | -0.290 | 1.132 |
| A8 | 1.761 | -2.863 | -1.893 | -0.619 | 0.856 |
| A9 | 2.013 | -2.636 | -1.694 | -0.361 | 0.951 |
| A10 | 1.746 | -3.123 | -1.982 | -0.558 | 1.056 |
| A11 | 1.857 | -3.034 | -1.912 | -0.580 | 1.025 |
| A12 | 1.924 | -2.723 | -1.797 | -0.440 | 0.950 |
| A13 | 1.010 | -4.364 | -2.461 | -0.240 | 1.840 |
| A14 | 0.994 | -5.012 | -2.484 | -0.215 | 1.560 |
| A15 | 0.904 | -6.172 | -2.376 | -0.227 | 1.905 |
| A16 | 0.954 | -4.934 | -2.655 | -0.313 | 1.939 |
| A17 | 0.808 | -6.843 | -3.096 | -0.467 | 2.248 |
| A18 | 1.049 | -5.052 | -2.155 | -0.247 | 1.365 |
| A19 | 0.987 | -4.591 | -2.451 | -0.342 | 1.367 |
| A20 | 0.903 | -5.417 | -2.296 | -0.296 | 1.499 |
| A21 | 1.249 | -3.623 | -2.170 | -0.703 | 0.991 |
| A22 | 1.238 | -3.416 | -2.089 | -0.524 | 1.153 |
| A23 | 0.981 | -4.206 | -2.607 | -0.848 | 1.341 |
| A24 | 1.059 | -4.079 | -2.640 | -0.765 | 1.245 |
| A25 | 1.148 | -3.858 | -2.108 | -0.886 | 0.985 |
| A26 | 1.477 | -3.730 | -2.654 | -0.933 | 0.828 |
| A27 | 1.527 | -3.829 | -2.736 | -0.959 | 0.869 |
| A28 | 1.514 | -3.884 | -2.496 | -0.685 | 1.055 |
| A29 | 1.242 | -3.763 | -2.895 | -0.856 | 1.091 |
| A30 | 1.537 | -3.496 | -2.412 | -0.981 | 0.965 |
| A31 | 1.737 | -3.539 | -2.377 | -0.953 | 1.023 |
| A32 | 1.568 | -3.472 | -2.595 | -0.919 | 1.006 |
| A33 | 1.643 | -3.524 | -2.566 | -0.911 | 0.957 |
| A34 | 1.517 | -3.203 | -2.409 | -0.873 | 1.024 |
| A35 | 1.975 | -2.701 | -1.778 | -0.733 | 0.748 |
| A36 | 1.934 | -3.331 | -2.065 | -0.718 | 0.638 |
| A37 | 1.980 | -2.696 | -1.822 | -0.583 | 0.850 |
| A38 | 2.048 | -3.212 | -1.823 | -0.484 | 0.906 |
| A39 | 1.838 | -3.137 | -1.987 | -0.736 | 0.841 |
| A40 | 1.755 | -2.871 | -1.905 | -0.485 | 0.923 |
| A41 | 2.040 | -2.865 | -2.004 | -0.588 | 0.715 |
| A42 | 2.103 | -2.761 | -1.806 | -0.715 | 0.717 |
| A43 | 2.023 | -2.771 | -1.707 | -0.493 | 0.830 |
| A44 | 2.129 | -2.772 | -1.876 | -0.520 | 0.757 |
| A45 | 1.793 | -2.922 | -1.916 | -0.584 | 0.719 |


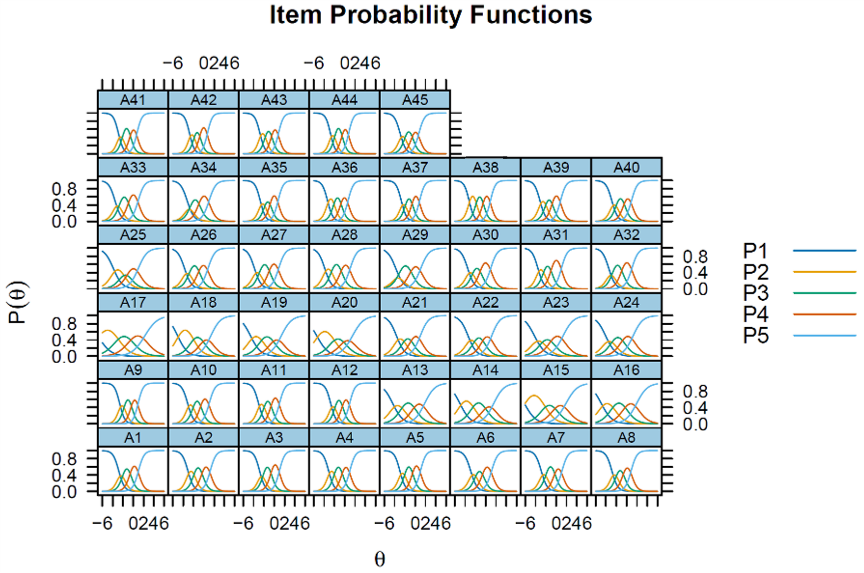


**Figure S2** The ICCs of 45 items in the final scale.

**Notes:** The five curves in the figure respectively correspond to the reaction probabilities of the subjects on the five options.

**Optimal cutoff value**

**Table S7** The sensitivity and specificity of the final scale

| **Total score of the scale** | **Sensitivity** | **1- specificity** | **Specificity** | **Youden’s index** | **Total score of the scale** | **Sensitivity** | **1- specificity** | **Specificity** | **Youden’s index** |
| --- | --- | --- | --- | --- | --- | --- | --- | --- | --- |
| 95.00 | 1.00 | 1.00 | 0 | 0 | 166.50 | 0.983 | 0.382 | 0.601 | 0.584 |
| 99.00 | 1.00 | 0.996 | 0.004 | 0.004 | 167.50 | 0.983 | 0.355 | 0.628 | 0.611 |
| 103.50 | 1.00 | 0.992 | 0.008 | 0.008 | 168.50 | 0.975 | 0.335 | 0.640 | 0.615 |
| 106.00 | 1.00 | 0.988 | 0.012 | 0.012 | 169.50 | 0.975 | 0.311 | 0.664 | 0.639 |
| 107.50 | 1.00 | 0.984 | 0.016 | 0.016 | 170.50 | 0.975 | 0.283 | 0.692 | 0.667 |
| 110.00 | 1.00 | 0.980 | 0.020 | 0.020 | 171.50 | 0.975 | 0.263 | 0.712 | 0.687 |
| 112.50 | 1.00 | 0.976 | 0.024 | 0.024 | 172.50 | 0.975 | 0.255 | 0.720 | 0.695 |
| 115.00 | 1.00 | 0.972 | 0.028 | 0.028 | 173.50 | 0.975 | 0.235 | 0.740 | 0.715 |
| 117.50 | 1.00 | 0.968 | 0.032 | 0.032 | 174.50 | 0.975 | 0.207 | 0.768 | 0.743 |
| 118.50 | 1.00 | 0.960 | 0.040 | 0.040 | 175.50 | 0.975 | 0.179 | 0.796 | 0.771 |
| 119.50 | 1.00 | 0.956 | 0.044 | 0.044 | 176.50 | 0.958 | 0.135 | 0.823 | 0.781 |
| 121.00 | 1.00 | 0.944 | 0.056 | 0.056 | 177.50 | 0.950 | 0.120 | 0.830 | 0.780 |
| 122.50 | 1.00 | 0.940 | 0.060 | 0.060 | 178.50 | 0.950 | 0.104 | 0.846 | 0.796 |
| 124.00 | 1.00 | 0.936 | 0.064 | 0.064 | 179.50 | 0.924 | 0.096 | 0.828 | 0.752 |
| 125.50 | 1.00 | 0.932 | 0.068 | 0.068 | 180.50 | 0.924 | 0.092 | 0.832 | 0.756 |
| 126.50 | 1.00 | 0.928 | 0.072 | 0.072 | 181.50 | 0.891 | 0.084 | 0.807 | 0.698 |
| 127.50 | 1.00 | 0.924 | 0.076 | 0.076 | 182.50 | 0.891 | 0.068 | 0.823 | 0.714 |
| 128.50 | 1.00 | 0.912 | 0.088 | 0.088 | 183.50 | 0.866 | 0.064 | 0.802 | 0.668 |
| 129.50 | 1.00 | 0.908 | 0.092 | 0.092 | 184.50 | 0.807 | 0.052 | 0.755 | 0.562 |
| 131.00 | 1.00 | 0.904 | 0.096 | 0.096 | 185.50 | 0.756 | 0.052 | 0.704 | 0.460 |
| 132.50 | 1.00 | 0.892 | 0.108 | 0.108 | 186.50 | 0.714 | 0.048 | 0.666 | 0.380 |
| 133.50 | 1.00 | 0.888 | 0.112 | 0.112 | 187.50 | 0.689 | 0.036 | 0.653 | 0.342 |
| 134.50 | 1.00 | 0.884 | 0.116 | 0.116 | 188.50 | .672 | 0.024 | 0.648 | 0.320 |
| 135.50 | 1.00 | 0.869 | 0.131 | 0.131 | 189.50 | .647 | 0.020 | 0.627 | 0.274 |
| 136.50 | 1.00 | 0.865 | 0.135 | 0.135 | 190.50 | .622 | 0.008 | 0.614 | 0.236 |
| 137.50 | 1.00 | 0.861 | 0.139 | 0.139 | 191.50 | .597 | 0.008 | 0.589 | 0.186 |
| 138.50 | 1.00 | 0.857 | 0.143 | 0.143 | 192.50 | .580 | 0.008 | 0.572 | 0.152 |
| 139.50 | 1.00 | 0.849 | 0.151 | 0.151 | 193.50 | .563 | 0.004 | 0.559 | 0.122 |
| 140.50 | 1.00 | 0.821 | 0.179 | 0.179 | 194.50 | .538 | 0.004 | 0.534 | 0.072 |
| 141.50 | 1.00 | 0.817 | 0.183 | 0.183 | 195.50 | .504 | 0.004 | 0.500 | 0.004 |
| 142.50 | 1.00 | 0.797 | 0.203 | 0.203 | 196.50 | .445 | 0.004 | 0.441 | -0.114 |
| 143.50 | 1.00 | 0.789 | 0.211 | 0.211 | 197.50 | .403 | 0.000 | 0.403 | -0.194 |
| 144.50 | 1.00 | 0.773 | 0.227 | 0.227 | 198.50 | .378 | 0.000 | 0.378 | -0.224 |
| 145.50 | 1.00 | 0.769 | 0.231 | 0.231 | 199.50 | .370 | 0.000 | 0.370 | -0.26 |
| 146.50 | 1.00 | 0.757 | 0.243 | 0.243 | 200.50 | .353 | 0.000 | 0.353 | -0.294 |
| 147.50 | 1.00 | 0.749 | 0.251 | 0.251 | 201.50 | .328 | 0.000 | 0.328 | -0.344 |
| 148.50 | 1.00 | 0.721 | 0.279 | 0.279 | 202.50 | .303 | 0.000 | 0.303 | -0.394 |
| 149.50 | 1.00 | 0.709 | 0.291 | 0.291 | 203.50 | .269 | 0.000 | 0.269 | -0.462 |
| 150.50 | 1.00 | 0.697 | 0.303 | 0.303 | 204.5000 | .252 | 0.000 | 0.252 | -0.496 |
| 151.50 | 1.00 | 0.669 | 0.331 | 0.331 | 205.5000 | .244 | 0.000 | 0.244 | -0.512 |
| 152.50 | 1.00 | 0.653 | 0.347 | 0.347 | 206.5000 | .235 | 0.000 | 0.235 | -0.530 |
| 153.50 | 1.00 | 0.641 | 0.359 | 0.359 | 207.5000 | .218 | 0.000 | 0.218 | -0.564 |
| 154.50 | 1.00 | 0.629 | 0.371 | 0.371 | 208.5000 | .185 | 0.000 | 0.185 | -0.630 |
| 155.50 | 1.00 | 0.614 | 0.386 | 0.386 | 209.5000 | .168 | 0.000 | 0.168 | -0.664 |
| 156.50 | 1.00 | 0.594 | 0.406 | 0.406 | 211.0000 | 0.118 | 0.000 | 0.118 | -0.764 |
| 157.50 | 1.00 | 0.570 | 0.430 | 0.430 | 212.5000 | 0.101 | 0.000 | 0.101 | -0.798 |
| 158.50 | 1.00 | 0.550 | 0.450 | 0.450 | 213.5000 | 0.084 | 0.000 | 0.084 | -0.832 |
| 159.50 | 1.00 | 0.538 | 0.462 | 0.462 | 214.5000 | 0.067 | 0.000 | 0.067 | -0.866 |
| 160.50 | 1.00 | 0.510 | 0.490 | 0.490 | 215.5000 | 0.042 | 0.000 | 0.042 | -0.916 |
| 161.50 | 1.00 | 0.490 | 0.510 | 0.510 | 216.5000 | 0.034 | 0.000 | 0.034 | -0.932 |
| 162.50 | 0.983 | 0.474 | 0.509 | 0.492 | 217.5000 | 0.017 | 0.000 | 0.017 | -0.966 |
| 163.50 | 0.983 | 0.446 | 0.537 | 0.520 | 220.5000 | 0.008 | 0.000 | 0.008 | -0.984 |
| 164.50 | 0.983 | 0.426 | 0.557 | 0.540 | 224.0000 | 0.000 | 0.000 | 0.000 | -1 |
| 165.50 | 0.983 | 0.410 | 0.573 | 0.556 |  |  |  |  |  |
